# Supplementary material
Source: publisher site journal article supplement (http://static.cambridge.org/content/id/urn:cambridge.org:id:article:S1751731119002234/resource/name/S1751731119002234supp002.doc)
Supplement: Supplementary file 1 [file S1751731119002234supp002.doc]

**Effects of** **dietary supplementation with grape seed procyanidins on nutrient utilization and gut function in weaned piglets**

Q. H. Li, H. S. Yan, H. Q. Li, J. J. Gao, R. R. Hao

**Animal: an international journal of animal bioscience**

**Supplementary Material S1**

**1 Method for detecting trypsin activity**

**1.1 Pre-treatment**

1.1.1 Preparation of pancreas supernatant: Weigh the pancreas tissues precisely and add the physiological saline with the ratio 1 g to 9 mL. Homogenate the mixture and centrifuge the homogenate at 2 500 rpm for 10 min. Extract the supernatant for further measurement.

1.1.2 Preparation of small intestine mucosa and chyme: Take fresh or thawed small intestine and lengthwise cut the intestine lengthwise along the intestine wall. Then collect the mucosa and chime anchored as the sample. Weigh the sample precisely and add saline with the ratio 1 g to 9 mL. Homogenize the mixture and centrifuge the homogenate at 3 000 rpm for 10 min. Extract the supernatant for further measurement and the supernatant can be preserved at -15°C for 15 days.

Note: The protein concentration of the supernatant should be measured simultaneously.

**1.2 Procedures**

The experimental operation procedures are shown in the table 1-1.

**Table 1-1** *Experimental operation procedures*

| Compositions (mL) | Blank | Sample |
| --- | --- | --- |
| Substrates for trypsin | 1.5 | 1.5 |
| Preheat at 37 ° C for 5 minutes | | |
| Supernatant |  | a |
| Homogenate medium for sample pre-treatment | a |  |

Record the time after the addition of the supernatant. Mix the solution and for each type of solution, transfer it into a cuvette with 0.5 cm path length. Record the absorbance value A1 30 seconds after the addition of the supernatant. Place the cuvette in a thermostatted compartment with 37°C set. Record the absorbance value A2 at the timing of 20 minutes 30 seconds.

Note: It is recommended to do the pre-test before and under the circumstance of A2-A1 out of the range of 0.05 ~ 0.8, the sample should be diluted or concentrated (increase the sample amount) to receive results within the range permitted.

**1.3 Detailed Procedures**

1.3.1 Regulate both two cuvettes with double distilled water with the spectrophotometer at 253 nm. (One cuvette for blank and the other one for sample measurement).

1.3.2 Warm the substrates solution at 37°C for more than 5 min.

1.3.3 Add 1.5 mL pre-warmed substrates solution into both tubes and then weigh a mL (a is an arbitrary number) homogenate medium solution into the corresponding tube. Start timing and shake the tube quickly to homogenize the mixture.

1.3.4 Transfer the mixture to the corresponding cuvette and record the absorbance values A1 at 253 nm for both tubes 30 seconds after timing.

1.3.5 Place the cuvettes into thermostatted compartments to maintain the temperature at 37°C. Were the thermostatted compartments unavailable, transfer the mixture in the cuvettes to back to the test tube and warm the solution at 37°C for 20 min.

1.3.6 Transfer the mixture back to the cuvettes and record the absorbance values A2 20 minutes and 30 seconds after timing.

1.3.7 Calculate the absorbance difference ΔA=A2-A1.

**1.4 Calculation Formula and Unit Definition**


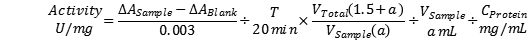


The activity unit:One activity unit is defined as every 0.003 change in absorbance per minute caused by trypsin in 1 mg protein from tissues at 37°C and pH=8.

# 2 Method for detecting lipase activity

**2.1 Procedures**

2.1.1 The equipment is adjusted to zero with Tris buffer, and then the optical density (OD) of each tube is measured at the wavelength of 420 nm using 1 cm path length cuvette.

2.1.2 Pre-warm the substrate buffer at 37 ° C for more than 5 minutes；

2.1.3 Add 25 uL of 20% tissue homogenate supernatant into the corresponding tube and then weigh 25 uL reagent IV solution into the corresponding tube, and pipette 2 mL pre-warmed substrate buffer into the tube. Shake the tube quickly to homogenize the mixture and start timing.

2.1.4 Transfer the mixture to the cuvette and record the absorbance values A1 at 420 nm for both tubes 30 seconds after timing.

2.1.5 Transfer the mixture in the cuvettes to back to the test tube and warm the solution at 37°C for 10 minutes, then quickly pour it into the cuvette. Read the absorbance value A2 for 10 minutes and 30 seconds after timing.

2.1.6 Calculate the absorbance difference ΔA=A2-A1.

**2.2 Calculation Formula and Unit Definition**

Calculation Formula:


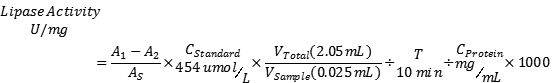


The activity unit: One activity unit is defined as one µmol substrate per minute consumed by 1 g protein from tissues at 37°C.

Note: AS represents the absorbance value of the concentration of standard tubes (454 µmol/L). The lipase activity in the pancreas is very high and the pre-test before is required to determine the optimal sample concentration (ΔA≤0.4).

# 3 Method for detecting amylase activity

# 3.1 Procedures

The experimental operation procedures are shown in the table 3-1.

**Table 3-1** *Experimental operation procedures*

| Compositions (mL) | Sample | Blank |
| --- | --- | --- |
| Substrate buffer (prewarmed at 37°C for 5 minutes) | 0.5 | 0.5 |
| Sample | 0.1 |  |
| Mix thoroughly and warm the mixture in a water bath at 37°C for 7.5 min | | |
| Iodine application solution | 0.5 | 0.5 |
| Double distilled water | 3.0 | 3.1 |

Mix and zero the 1cm path length cuvette at 660 nm with double distilled water. Record the optical density (OD) of each tube.

Note: Pre-measurement can be done to determine the amount of substrate buffer added so that the absolute OD value (ODBlank-ODSample) is in the range of 0.05 ~ 0.15.

**3.2 Calculation Formula and Unit Definition**

Calculation Formula:

#
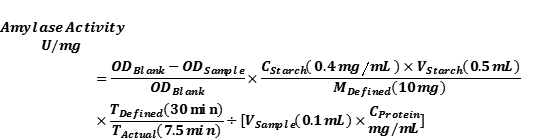


The activity unit: One amylase activity unit is defined as 10 mg starch hydrolyzed within 30 minutes at 37°C with enzymes in 1 mg protein.

# 4 Method for detecting maltase activity

# 4.1 Procedures

The experimental operation procedures are shown in the table 4-1.

**Table 4-1** *Experimental operation procedures*

| Solution Composition (μL) | Blank | Standard | Sample | Comparison |
| --- | --- | --- | --- | --- |
| Double distilled water | 10 |  |  |  |
| 5.55 mmol/L glucose solution |  | 10 |  |  |
| Sample |  |  | 10 |  |
| Substrate | 20 | 20 | 20 | 20 |
| Mix thoroughly and warm the mixture in a water bath at 37°C for 20 minutes | | | | |
| Terminator | 10 | 10 | 10 | 10 |
| Chromogenic agent | 1 000 | 1 000 | 1 000 | 1 000 |
| Sample |  |  |  | 10 |

Every solution is mixed and heated in water bath with 37°C for 15 minutes. The equipment is adjusted to zero with double distilled water, and then the optical density (OD) of each tube is measured at the wavelength of 505 nm using cuvettes with 0.5 cm path length.

Note 1: The method gives stable results. However, this method requires to measure the four tubes simultaneously. The blank tube should be compared with the standard one while the sample tube is compared to the remaining one.

Note 2: Before analyzing massive number of samples, a series of experiments should be operated in order to obtain the best concentration values. Normally, the OD value should be below 0.5 to give the best result.

**4.2 Calculation Formula and Unit Definition**

Calculation Formula:


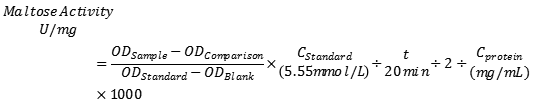


As two glucose molecules would generated with one maltose molecule hydrolyzed. Thus the result should be halved.

The activity unit: Under the condition of 37°C and pH=6.0, one maltase activity unit is defined as one mmol maltose hydrolyzed by 1 mg protein per minute.

# 5 Method for detecting sucrase activity

**5.1 Procedures**

The experimental operation procedures are shown in the table 5-1.

**Table 5-1** *Experimental operation procedures*

| Solution Composition (μL) | Blank | Standard | Sample | Comparison |
| --- | --- | --- | --- | --- |
| Double distilled water | 10 |  |  |  |
| 5.55mmol/L glucose solution |  | 10 |  |  |
| Sample |  |  | 10 |  |
| Substrate | 20 | 20 | 20 | 20 |
| Mix thoroughly and warm the mixture in a water bath at 37°C for 20 min | | | | |
| Terminator | 10 | 10 | 10 | 10 |
| Chromogenic agent | 1 000 | 1 000 | 1 000 | 1 000 |
| Sample |  |  |  | 10 |

Every solution is mixed and heated in water bath with 37°C for 15 minutes. The equipment is adjusted to zero with double distilled water, and then the optical density (OD) of each tube is measured at the wavelength of 505 nm using cuvettes with 0.5 cm path length.

Note 1. The method gives stable results. However, this method requires to measure the four tubes simultaneously. The blank tube should be compared with the standard one while the sample tube is compared to the remaining one.

Note 2. Before analyzing massive number of samples, a series of experiments should be operated in order to obtain the best concentration values. Normally, the OD value should be below 0.5 to give the best result.

**5.2 Calculation Formula and Unit Definition**

Calculation Formula:


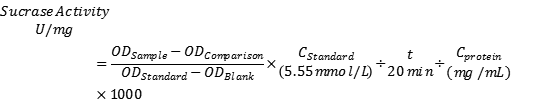


The activity unit: Under the condition of 37°C and pH=6.0, one sucrase activity unit is defined as one mmol sucrose hydrolyzed by 1 mg protein per minute.

# 6 Method for detecting lactase activity

**6.1 Procedures**

The experimental operation procedures are shown in the table 6-1.

**Table 6-1** *Experimental operation procedures*

| Solution Composition (μL) | Blank | Standard | Sample | Comparison |
| --- | --- | --- | --- | --- |
| Double distilled water | 10 |  |  |  |
| 5.55 mmol/L glucose solution |  | 10 |  |  |
| Sample |  |  | 10 |  |
| Substrate | 20 | 20 | 20 | 20 |
| Mix thoroughly and warm the mixture in a water bath at 37°C for 20 min | | | | |
| Terminator | 10 | 10 | 10 | 10 |
| Chromogenic agent | 1 000 | 1 000 | 1 000 | 1 000 |
| Sample |  |  |  | 10 |

Every solution is mixed and heated in water bath with 37°C for 15 minutes. The equipment is adjusted to zero with double distilled water, and then the optical density (OD) of each tube is measured at the wavelength of 505 nm using cuvettes with 0.5 cm path length.

Note 1. The method gives stable results. However, this method requires to measure the four tubes simultaneously. The blank tube should be compared with the standard one while the sample tube is compared to the remaining one.

Note 2. Before analyzing massive number of samples, a series of experiments should be operated in order to obtain the best concentration values. Normally, the OD value should be below 0.5 to give the best result.

**6.2 Calculation Formula and Unit Definition**

Calculation Formula:


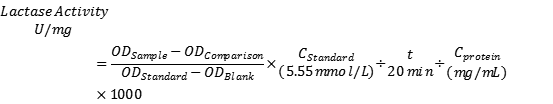


The activity unit: Under the condition of 37℃ and pH=6.0, One lactase activity unit is defined as one mmol lactose hydrolyzed by 1 mg protein per minute.

**7 Method for detecting blood glucose content**

**7.1 Test conditions**

The test conditions are shown in the table 7-1.

|  | Test conditions |
| --- | --- |
| Sample dosage | 10 μL |
| Working fluid dosage | 1 000 μL |
| Temperature | 37℃ |
| Wavelength | 505 nm |
| Reaction time | 900 s |

**Table 7-1** *Test conditions*

**7.2 Procedures**

The experimental operation procedures are shown in the table 7-2.

**Table 7-2** *Experimental operation procedures*

| Compositions (μL)) | Blank tube | Calibration tube | Quality control tube | Sample tube |
| --- | --- | --- | --- | --- |
| Working fluid | 1 000 | 1 000 | 1 000 | 1 000 |
| Distilled water | 10 | － | － | － |
| Calibrator | － | 10 | － | － |
| Quality control | － | － | 10 | － |
| Sample | － | － | － | 10 |

Mix thoroughly, warm the mixture at 37 ℃ in a water bath for 15 minutes. After chromogenesis, the color can be stable for at least 2 hours. Zero the blank with distilled water and record the optical density (OD) value A of calibration tube and sample tube at the wavelength of 505 nm using cuvettes with 1 cm path length.

**7.3 Calculation formula**


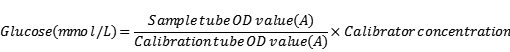


**8 Method for detecting blood total protein**

**8.1 Procedures**

The experimental operation procedures are shown in the table 8-1.

**Table 8-1** *Experimental operation procedures*

| Compositions (mL) | Blank | Standard | Sample |
| --- | --- | --- | --- |
| Double distilled water | 0.05 |  |  |
| 0.563 g/L Standard |  | 0.05 |  |
| Sample |  |  | 0.05 |
| Coomassie Brilliant Blue Developer | 3.0 | 3.0 | 3.0 |

Mix thoroughly and let stand for 10 minutes. The equipment is adjusted to zero with double distilled water, and then the optical density (OD) of each tube is measured at the wavelength of 595 nm using cuvettes with 1 cm path length.

**8.2 Calculation formula**


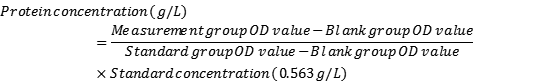


# 9 Method for detecting blood urea nitrogen

**9.1 Procedures**

The experimental operation procedures are shown in the table 9-1.

**Table 9-1** *Experimental operation procedures*

| Compositions (mL) | Blank | Standard | Sample |
| --- | --- | --- | --- |
| Double distilled water | 0.02 |  |  |
| 10 mmol/L BUN standard solution |  | 0.02 |  |
| Sample |  |  | 0.02 |
| enzyme stock solution | 0.25 | 0.25 | 0.25 |
| Mix thoroughly and warm the mixture in a water bath at 37°C for exactly 10 min | | | |
| chromogenic agent | 1 | 1 | 1 |
| Alkaline sodium hypochlorite | 1 | 1 | 1 |

Mix thoroughly and warm the mixture at 37°C in a water bath for 10 min. Zero the 1 cm path length cuvettes at 640 nm with double distilled water and record the OD value of each tube.

**9.2 Calculation Formula**


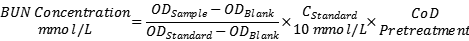


Note: CoD represents the coefficient of dilution in the pretreatment process.

# 10 Method for detecting blood diamine oxidase (DAO)

# 10.1 Procedures

10.1.1 Zero 0.5 cm path length cuvettes with double distilled water at 340 nm using a UV-Spectrophotometer.

10.1.2 Add 0.08 mL sample serum to the test tube and transfer 0.8 mL reagent to the test tube immediately. Mix thoroughly and start timing.

10.1.3 Transfer the solution into a cuvette and record the absorbance A1 20 seconds after timing.

10.1.4 Place the cuvette in a thermostatted compartment and set the surrounding temperature to 37°C. Were the thermostatted compartment unavailable, transfer the mixture back to the test tube and warm at 37°C for 10 min. Then transfer the mixture back to the cuvette if necessary and record the absorbance A2 10 minutes 20 seconds after timing.

10.1.5 Calculate ΔA=A1-A2.

**10.2 Calculation Formula**


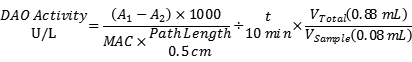


Note: MAC represents the millimolar attenuation coefficient of NADH at 340 nm which is 6.3 mM-1·cm-1.

**11 Method for detecting blood endotoxin content**

**11.1 Experimental operation**

Preparation of bacterial endotoxin standard solution is shown in the table 11-1. The endotoxin solution of 1.0 U/mL was diluted into 0.1, 0.25, 0.5, 1.0 EU/mLconcentration gradient with the endotoxin solution of 1.0 U/mL as the mother solution. The standard solution of endotoxin should be used up within 4 hours. The experimental operation procedures are shown in the table 11-2.

**Table 11-1** Preparation *of endotoxin standard solution*

| Endotoxin concentration (U/mL) | 1 | 0.5 | 0.25 | 0.1 |
| --- | --- | --- | --- | --- |
| Bacterial endotoxin test water (mL) | 0 | 0.5 | 0.75 | 0.9 |
| 1 U/mL endotoxin solution (mL) | 1 | 0.5 | 0.25 | 0.1 |

**Table 11-2** *Experimental operation procedures*

| Compositions (µL) | Negative control | Endotoxin standard | | sample |
| --- | --- | --- | --- | --- |
| Bacterial endotoxin test water | 100 |  |  | |
| Endotoxin standard solution |  | 100 |  | |
| Sample |  |  | 100 | |
| Tachypleus amebocyte lysate | 100 | 100 | 100 | |
| Mix thoroughly and warm the mixture at 37°C for 10 min | | | | |
| Chromogenic substrate solution | 100 | 100 | 100 | |
| Mix thoroughly and warm the mixture at 37°C for 10 min | | | | |
| Azo reagent 1 solution | 500 | 500 | 500 | |
| Azo reagent 2 solution | 500 | 500 | 500 | |
| Azo reagent 3 solution | 500 | 500 | 500 | |
| Mix, let stand for 5 minutes, read the absorbance at 545 nm | | | | |

**11.2 Calculations**

Establish a standard curve: *Y = b X + a*, where Y is the absorbance value at 545 nm; X is the concentration of endotoxin; b is the slope of the line; and a is the Y-intercept. The experiment is valid when the experimental data meets the following three conditions:

a. Correlation coefficient of standard curve r≥ 0.980,

b. The Y value of the lowest point of the standard curve is greater than the Y value of the negative control.

c. The average value of the parallel tubes of the test sample is within the interval of the standard curve.
